# Supplementary material
Source: publisher site journal article supplement (https://e-cmh.org/upload/media/cmh-2024-0042-Supplementary-Fig-1.pdf)
Supplement: Supplementary file 1 [file cmh-2024-0042-Supplementary-Fig-1.pdf]

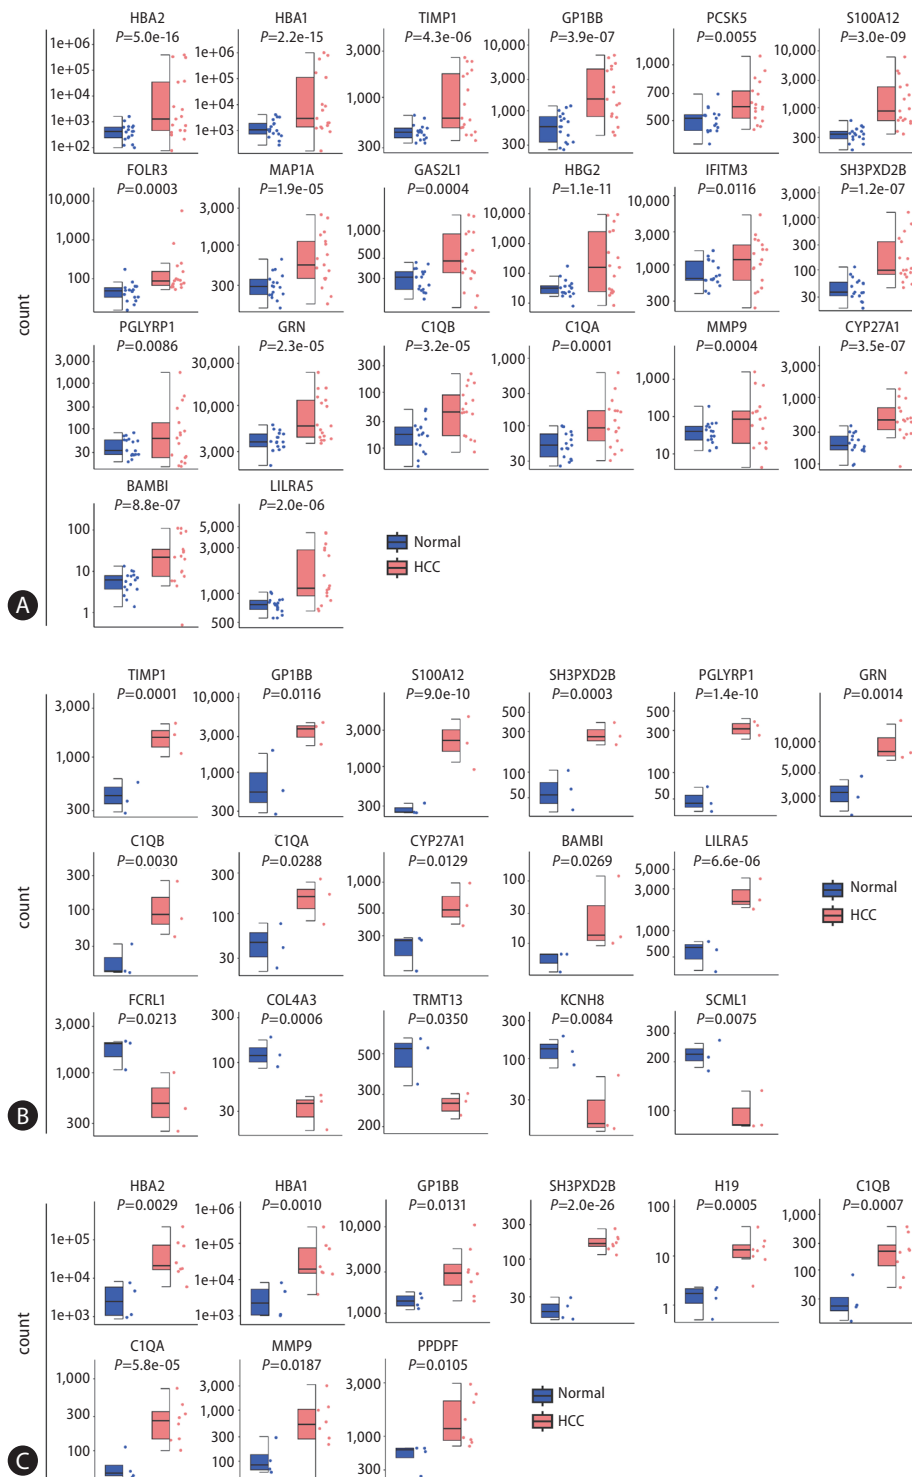

**Supplementary Figure 1.** Haploid plots for DEG expression from each validation dataset. (A–C) Haploid plots displaying the gene expression level of each significant DEG. (A) DEGs from VD1. (B) DEGs from VD2. (C) DEGs from VD3. DEG, differentially expressed gene; VD, validation dataset.
